# Supplementary material
Source: MDPI journal article supplement (https://www.mdpi.com/2073-4441/15/2/253)
Supplement: s1 [file s1]

# Groundwater Management and Allocation Models: A Review

**Table S1.** Classification of different quantitative simulation groundwater models in the literature

| Author (year) | Simulation        |         | Uncertainty                         | Optimization        | Game theory or Conflict resolution                  | Surface water models | Time step | Case study                                                   |
|---------------|-------------------|---------|-------------------------------------|---------------------|-----------------------------------------------------|----------------------|-----------|--------------------------------------------------------------|
|               | Quantity          | Quality |                                     |                     |                                                     |                      |           |                                                              |
| [1]           | MODFLOW           |         |                                     |                     |                                                     |                      | Monthly   | Hypothetical                                                 |
| [2]           | MODFLOW-96        |         |                                     |                     |                                                     |                      | Monthly   | Hill Country, USA                                            |
| [3]           | WatFlow           |         |                                     |                     |                                                     |                      | Annual    | Oro Moraine, Canada                                          |
| [4]           |                   |         | MCS and fuzzy logic-based alpha-cut |                     |                                                     |                      |           | Vannetin basin, France                                       |
| [5]           | MODFLOW           |         | GLUE                                |                     |                                                     |                      |           | Hypothetical                                                 |
| [6]           |                   |         |                                     |                     | Nash bargaining scenario -Nash non-cooperative game |                      |           | El Paso, Texas and Ciudad Juarez, Mexico                     |
| [7]           | ISOQUAD           |         |                                     | CDDP and GA         |                                                     |                      | 3 Months  | Hypothetical                                                 |
| [8]           | MODFLOW           |         |                                     | Linear optimization |                                                     |                      | Annual    | Island                                                       |
| [9]           | MODFLOW and UCODE |         |                                     |                     |                                                     |                      | Annual    | Glacial-till plain on the Jutland peninsula, Western Denmark |
| [10]          | MODFLOW           |         |                                     | MINLP               |                                                     |                      | Annual    | Upper San Pedro River Basin, southeastern Arizona, Mexico    |
| [11]          | LTM               |         |                                     | NSGA-II             |                                                     |                      | Annual    | Hypothetical                                                 |
| [12]          |                   |         |                                     |                     | Non-cooperative equilibrium                         |                      |           | Fault zone aquifer of south-central Texas                    |
| [13]          |                   |         | Fuzzy $\alpha$ -cut<br>MCS          |                     |                                                     |                      |           |                                                              |
| [14]          | MODFLOW           |         |                                     |                     |                                                     |                      | Monthly   | Cosumnes River, California, US                               |
| [15]          | MODFLOW           |         |                                     | GA and ANN          |                                                     |                      | Monthly   | The southern part of Tehran, Iran                            |
| [16]          |                   |         |                                     |                     | Game theory                                         |                      |           | State of Guanajuato, Mexico                                  |
| [17]          |                   |         |                                     |                     | Game-theoretic model                                |                      |           | Hypothetical                                                 |
| [18]          | MODFLOW           |         |                                     |                     |                                                     |                      | Annual    | Ismarida plain, Northeastern Greece                          |
| [19]          | FEFLOW            |         |                                     |                     |                                                     |                      | Monthly   | Zhangye, China                                               |
| [20]          | MODFLOW           |         | GLUE<br>BMA                         |                     |                                                     |                      |           | Hypothetical                                                 |
| [21]          | MODFLOW           |         |                                     |                     |                                                     |                      |           | North China Plain, China                                     |
| [22]          |                   |         |                                     | CDDP-ANFIS          |                                                     |                      | 3 Months  | Hypothetical                                                 |
| [23]          | MOC               |         |                                     | GA                  |                                                     |                      | Monthly   | Hypothetical                                                 |
| [24]          | MODFLOW           |         |                                     |                     |                                                     | SWAT                 | Monthly   | Korea                                                        |

|      |                         |                                                                          |             |                      |         |                                                 |
|------|-------------------------|--------------------------------------------------------------------------|-------------|----------------------|---------|-------------------------------------------------|
| [25] |                         | FSPDE, FPDE,<br>SPDE                                                     |             |                      |         | Hypothetical                                    |
| [26] |                         | advective<br>mass<br>transport                                           |             | GA                   | Annual  | Hypothetical                                    |
| [27] | MODFLOW                 |                                                                          |             | SWAT                 | Monthly | Mihocheon<br>watershed, South<br>Korea          |
| [28] | FEHM                    | NSMC<br>MCMC<br>(DREAM)                                                  | AMALGAM     |                      | Annual  | Yucca Flat, USA                                 |
| [29] |                         | Fuzzy-<br>probabilistic and<br>conventional<br>Monte Carlo<br>simulation |             |                      |         | Washington, USA                                 |
| [30] |                         | Hybrid<br>propagation                                                    |             |                      | Annual  |                                                 |
| [31] | MODFLOW<br>and ANN      |                                                                          | GA          |                      | Monthly | Najafabad plain,<br>Iran                        |
| [32] | MODFLOW                 | AM-MCMC                                                                  |             |                      |         | Hypothetical                                    |
| [33] | MODFLOW                 |                                                                          |             | SWAT                 | Monthly | Yellow River Basin,<br>Inner Mongolia,<br>China |
| [34] | AEM                     |                                                                          | PSO         |                      | Annual  | Dore-France                                     |
| [35] |                         |                                                                          | ECACO       |                      | Daily   | Hypothetical                                    |
| [36] | GMS                     |                                                                          |             | Visual<br>Basic      | Annual  | Maraghe plain, Iran                             |
| [37] | MODFLOW                 | MPS and<br>SGeMS                                                         |             |                      | Annual  | Ølgod, Jutland,<br>Denmark                      |
| [38] | GMS-<br>MODFLOW<br>2000 |                                                                          |             |                      | Monthly | Nakuru district,<br>Nairobi                     |
| [39] | MODFLOW                 |                                                                          |             |                      | Monthly | NCP, China                                      |
| [40] | ParFlow                 |                                                                          |             |                      | Monthly | Klamath River,<br>California, USA               |
| [41] | SGMP                    |                                                                          |             |                      |         | Haryana, India                                  |
| [42] | MODFLOW                 | NSMC                                                                     |             |                      |         |                                                 |
| [43] | MODFLOW                 |                                                                          | HS          |                      | Monthly | Izmir, Turkey                                   |
| [44] | MODFLOW                 |                                                                          | DE and BFGS |                      | Monthly | Izmir, Turkey                                   |
| [45] | MODFLOW                 |                                                                          | GA          |                      | Monthly | Iran                                            |
| [46] |                         |                                                                          |             | SCR social<br>choice |         | Spain                                           |
| [47] | MODFLOW                 |                                                                          |             |                      | Annual  | Egypt                                           |
| [48] | MODFLOW                 |                                                                          | NSGA-II     | MCSGA and<br>NGA     | Monthly | Rafsanjan plain, Iran                           |
| [49] | MODFLOW                 | MCS                                                                      | NSGA-II     |                      | Annual  | Muscat, Oman                                    |

**Table S2.** The research that employed surface water modeling in conjunction with groundwater modeling

| Author (year) | Simulation |         | Uncertainty | Optimization | Game theory or Conflict resolution | Surface water models | Time step | Case study                                           |
|---------------|------------|---------|-------------|--------------|------------------------------------|----------------------|-----------|------------------------------------------------------|
|               | Quantity   | Quality |             |              |                                    |                      |           |                                                      |
| [50]          | MODFLOW    |         |             |              |                                    | SWAT                 | Monthly   | Rattlesnake Creek basin in south-central Kansas, USA |
| [51]          | MODFLOW    |         |             |              |                                    | SWAT                 | Monthly   | Kansas, USA                                          |
| [52]          | MODFLOW    | MT3DMS  |             |              |                                    | SWAT                 | Monthly   | Bonello watershed, Italy                             |
| [24]          | MODFLOW    |         |             |              |                                    | SWAT                 | Monthly   | Korea                                                |
| [27]          | MODFLOW    |         |             |              |                                    | SWAT                 | Monthly   | Mihocheon watershed, South Korea                     |
| [33]          | MODFLOW    |         |             |              |                                    | SWAT                 | Monthly   | Yellow River Basin, Inner Mongolia, China            |
| [36]          | GMS        |         |             |              |                                    | Visual Basic         | Annual    | Maraghe plain, Iran                                  |
| [53]          | MODFLOW    | MT3D    |             |              |                                    | SWAT                 | Annual    | Upper Yamuna watershed, India                        |
| [54]          | MODFLOW    | MT3D    |             |              |                                    | SWAT                 | Monthly   | Jucar river basin, Spain                             |
| [55]          | MODFLOW    |         |             |              |                                    | SWAT                 | Monthly   | Neishaboort plain, Iran                              |
| [56]          | MODFLOW    | MT3DMS  |             | MOPSO        |                                    | SWAT                 | Monthly   | Isfahan-Barkhoar, Iran                               |
| [57]          | MODFLOW    | MT3DMS  | DREAMzs     | MOPSO        |                                    | SWAT                 | Monthly   | Isfahan-Barkhoar, Iran                               |
| [58]          | MODFLOW    | MT3DMS  | DREAMzs     | MOPSO        | SCR. FB                            | SWAT                 | Monthly   | Isfahan-Barkhoar, Iran                               |

**Table S3.** Classification of different qualitative simulation groundwater models in the literature

| Author (year) | Simulation |         | Uncertainty       | Optimization                                                     | Game theory or Conflict resolution | Surface water models | Time step | Case study                               |
|---------------|------------|---------|-------------------|------------------------------------------------------------------|------------------------------------|----------------------|-----------|------------------------------------------|
|               | Quantity   | Quality |                   |                                                                  |                                    |                      |           |                                          |
| [59]          | MODFLOW    | MT3D    |                   | Bundle-Trust                                                     |                                    |                      | Annual    | Na'aman Aquifer, Western Galilee, Israel |
| [60]          | MODFLOW    | MT3D    | Monte Carlo       | Monte Carlo Simple Genetic algorithm and Noisy Genetic algorithm |                                    |                      | Annual    | Hypothetical                             |
| [52]          | MODFLOW    | MT3DMS  |                   |                                                                  |                                    | SWAT                 | Monthly   | Bonello watershed, Italy                 |
| [61]          | MODFLOW    | MT3DMS  | Spatial bootstrap |                                                                  |                                    |                      | Daily     | Hypothetical                             |

|      |          |          |             |                               |                             |      |          |                               |
|------|----------|----------|-------------|-------------------------------|-----------------------------|------|----------|-------------------------------|
| [62] | MODFLOW  | MT3D     | Monte Carlo | GA                            |                             |      |          | Hypothetical                  |
| [63] | MODFLOW  | MT3D     |             |                               |                             |      | Monthly  | Balasore coastal basin, India |
| [64] | MODFLOW  | MT3D     |             | NSGA-II                       | YCRT                        |      | Monthly  | Tehran aquifer, Iran          |
| [65] | MODFLOW  | MT3DMS   |             | MINOS                         |                             |      | Annual   | hypothetical                  |
| [66] | MODFLOW  | SWAT     |             |                               |                             |      | Annual   | Ras Sudr, Egypt               |
| [67] | MODFLOW  | MT3D     |             | NSGA-II                       | RSBT                        |      | Monthly  | Tehran aquifer, Iran          |
| [68] | SAHYSMOD | SAHYSMOD |             |                               |                             |      | Seasonal | Haryana State, India          |
| [69] | MODFLOW  | MT3D     | FPPA        |                               |                             |      | Annual   | Hypothetical                  |
| [70] | MODFLOW  | MT3D     | FOK         | NSGA-II                       |                             |      | Annual   | hypothetical                  |
| [53] | MODFLOW  | MT3D     |             |                               |                             | SWAT | Annual   | Upper Yamuna watershed, India |
| [71] |          | PGREM3D  | MCMC        |                               |                             |      | Daily    | Hypothetical                  |
| [54] | MODFLOW  | MT3D     |             |                               |                             | SWAT | Monthly  | Jucar river basin, Spain      |
| [72] | MODFLOW  | MT3D     |             |                               |                             |      | Monthly  | Nile Delta, Egypt             |
| [73] | MODFLOW  | MT3DMS   |             | NSGA-II                       |                             |      | Monthly  | Najaf Abad plain, Iran        |
| [74] | MODFLOW  | MT3DMS   | Monte Carlo | NSGA-II                       | SCR Fallback Bargaining     |      | Monthly  | Kavar-Maharloo aquifer, Iran  |
| [56] | MODFLOW  | MT3DMS   |             | MOPSO                         |                             | SWAT | Monthly  | Isfahan-Barkhoar, Iran        |
| [75] | MODFLOW  | MT3DMS   |             | Multi-objectives optimization | Non-cooperative game theory |      | Monthly  | Bad-Khaledabad, Iran          |
| [57] | MODFLOW  | MT3DMS   | DREAMzs     | MOPSO                         |                             | SWAT | Monthly  | Isfahan-Barkhoar, Iran        |
| [58] | MODFLOW  | MT3DMS   | DREAMzs     | MOPSO                         | SCR. FB                     | SWAT | Monthly  | Isfahan-Barkhoar, Iran        |

**Table S4.** The research employing optimization models in conjunction with simulation

| Author (year) | Simulation |         | Uncertainty | Optimization        | Game theory or Conflict resolution | Surface water models | Time step | Case study                                                |
|---------------|------------|---------|-------------|---------------------|------------------------------------|----------------------|-----------|-----------------------------------------------------------|
|               | Quantity   | Quality |             |                     |                                    |                      |           |                                                           |
| [59]          | MODFLOW    | MT3D    |             | Bundle-Trust        |                                    |                      | Annual    | Na'aman Aquifer, Western Galilee, Israel                  |
| [7]           | ISOQUAD    |         |             | CDDP and GA         |                                    |                      | 3 Months  | Hypothetical                                              |
| [76]          | MODFLOW    |         |             | Linear optimization |                                    |                      | Annual    | Island                                                    |
| [10]          | MODFLOW    |         |             | MINLP               |                                    |                      | Annual    | Upper San Pedro River Basin, southeastern Arizona, Mexico |
| [11]          | LTM        |         |             | NSGA-II             |                                    |                      | Annual    | Hypothetical                                              |

|      |                 |                          |              |                               |                             |          |                                      |                        |
|------|-----------------|--------------------------|--------------|-------------------------------|-----------------------------|----------|--------------------------------------|------------------------|
| [15] | MODFLOW         |                          |              | GA and ANN                    |                             | Monthly  | The southern part of Tehran, Iran    |                        |
| [77] | (GS/RF)         |                          |              | CMA-ES                        |                             |          | Hypothetical                         |                        |
| [22] |                 |                          |              | CDDP-ANFIS                    |                             | 3 Months | Hypothetical                         |                        |
| [62] | MODFLOW         | MT3D                     | Monte Carlo  | GA                            |                             |          | Hypothetical                         |                        |
| [23] | MOC             |                          |              | GA                            |                             | Monthly  | Hypothetical                         |                        |
| [64] | MODFLOW         | MT3D                     |              | NSGA-II                       | YCRT                        | Monthly  | Tehran aquifer, Iran                 |                        |
| [65] | MODFLOW         | MT3DMS                   |              | MINOS                         |                             | Annual   | hypothetical                         |                        |
| [26] |                 | advective mass transport |              | GA                            |                             | Annual   | Hypothetical                         |                        |
| [28] | FEHM            |                          | NSMC         | AMALGAM                       |                             | Annual   | Yucca Flat, USA                      |                        |
|      |                 |                          | MCMC (DREAM) |                               |                             |          |                                      |                        |
| [67] | MODFLOW         | MT3D                     |              | NSGA-II                       | RSBT                        | Monthly  | Tehran aquifer, Iran                 |                        |
| [31] | MODFLOW and ANN |                          |              | GA                            |                             | Monthly  | Najafabad plain in westcentral, Iran |                        |
| [34] | AEM             |                          |              | PSO                           |                             | Annual   | Dore-France                          |                        |
| [35] |                 |                          |              | ECACO                         |                             | Daily    | Hypothetical                         |                        |
| [70] | MODFLOW         | MT3D                     | FOK          | NSGA-II                       |                             | Annual   | hypothetical                         |                        |
| [43] | MODFLOW         |                          |              | HS                            |                             | Monthly  | Izmir, Turkey                        |                        |
| [44] | MODFLOW         |                          |              | DE and BFGS                   |                             | Monthly  | Izmir, Turkey                        |                        |
| [45] | MODFLOW         |                          |              | GA                            |                             | Monthly  | Iran                                 |                        |
| [48] | MODFLOW         |                          |              | NSGA-II                       | MCSGA and NGA               | Monthly  | Rafsanjan plain, Iran                |                        |
| [49] | MODFLOW         |                          | MCS          | NSGA-II                       |                             | Annual   | aquifer-Muscat, Oman                 |                        |
| [73] | MODFLOW         | MT3DMS                   |              | NSGA-II                       |                             | Monthly  | Najaf Abad plain, Iran               |                        |
| [78] | MODFLOW         |                          | Monte Carlo  | NSGA-II                       | SCR Fallback Bargaining     | Monthly  | Tashk-Bakhtegan river basin, Iran    |                        |
| [74] | MODFLOW         | MT3DMS                   | Monte Carlo  | NSGA-II                       | SCR Fallback Bargaining     | Monthly  | Kavar-Maharloo aquifer, Iran         |                        |
| [56] | MODFLOW         | MT3DMS                   |              | MOPSO                         |                             | SWAT     | Monthly                              | Isfahan-Barkhoar, Iran |
| [75] | MODFLOW         | MT3DMS                   |              | Multi-objectives optimization | Non-cooperative game theory | Monthly  | Khaledabad, Iran                     |                        |
| [57] | MODFLOW         | MT3DMS                   | DREAMzs      | MOPSO                         |                             | SWAT     | Monthly                              | Isfahan, Iran          |
| [58] | MODFLOW         | MT3DMS                   | DREAMzs      | MOPSO                         | SCR FB                      | SWAT     | Monthly                              | Isfahan, Iran          |

**Table S5.** The research employed uncertainty analyses in conjunction with simulation

| Author (year) | Simulation |         | Uncertainty                                                 | Optimization | Game theory or Conflict resolution | Surface water models | Time step | Case study                        |
|---------------|------------|---------|-------------------------------------------------------------|--------------|------------------------------------|----------------------|-----------|-----------------------------------|
|               | Quantity   | Quality |                                                             |              |                                    |                      |           |                                   |
| [4]           |            |         | MCS and fuzzy logic-based alpha-cut                         |              |                                    |                      |           | Vannetin basin, France            |
| [5]           | MODFLOW    |         | GLUE                                                        |              |                                    |                      |           | Hypothetical                      |
| [79]          | BIGFLOW    |         | Monte Carlo                                                 |              |                                    |                      |           | Plain of Tadla, Morocco           |
| [13]          |            |         | Fuzzy $\alpha$ -cut<br>MCS                                  |              |                                    |                      |           |                                   |
| [61]          | MODFLOW    | MT3DMS  | Spatial bootstrap                                           |              |                                    |                      | Daily     | Hypothetical                      |
| [20]          | MODFLOW    |         | GLUE<br>BMA                                                 |              |                                    |                      |           | Hypothetical                      |
| [62]          | MODFLOW    | MT3D    | Monte Carlo                                                 | GA           |                                    |                      |           | Hypothetical                      |
| [25]          |            |         | FSPDE, FPDE, SPDE                                           |              |                                    |                      |           | Hypothetical                      |
| [28]          | FEHM       |         | NSMC<br>MCMC (DREAM)                                        | AMALGAM      |                                    |                      | Annual    | Yucca Flat, USA                   |
| [29]          |            |         | Fuzzy-probabilistic and conventional Monte Carlo simulation |              |                                    |                      |           | Hanford site, Washington, USA     |
| [30]          |            |         | Hybrid propagation                                          |              |                                    |                      | Annual    |                                   |
| [32]          | MODFLOW    |         | AM-MCMC                                                     |              |                                    |                      |           | Hypothetical                      |
| [69]          | MODFLOW    | MT3D    | FPPA                                                        |              |                                    |                      | Annual    | Hypothetical                      |
| [70]          | MODFLOW    | MT3D    | FOK                                                         | NSGA-II      |                                    |                      | Annual    | hypothetical                      |
| [71]          |            | PGREM3D | MCMC                                                        |              |                                    |                      | Daily     | Hypothetical                      |
| [37]          | MODFLOW    |         | MPS and SGeMS                                               |              |                                    |                      | Annual    | Ølgod, Jutland, Denmark           |
| [42]          | MODFLOW    |         | NSMC                                                        |              |                                    |                      |           |                                   |
| [80]          | GFLOW      |         | Monte Carlo                                                 |              |                                    |                      |           | Wisconsin. USA                    |
| [49]          | MODFLOW    |         | MCS                                                         | NSGA-II      |                                    |                      | Annual    | aquifer-Muscat, Oman              |
| [81]          | MODFLOW    |         | GLUE                                                        |              |                                    |                      | Monthly   | Birjand aquifer, Iran             |
| [78]          | MODFLOW    |         | Monte Carlo                                                 | NSGA-II      | SCR-Fallback Bargaining            |                      | Monthly   | Tashk-Bakhtegan river basin, Iran |
| [74]          | MODFLOW    | MT3DMS  | Monte Carlo                                                 | NSGA-II      | SCR-Fallback Bargaining            |                      | Monthly   | Kavar-Maharloo aquifer, Iran      |
| [57]          | MODFLOW    | MT3DMS  | DREAMzs                                                     | MOPSO        |                                    | SWAT                 | Monthly   | Isfahan-Barkhoar, Iran            |

## References

1. Başagaoglu, H., & Mariño, M. A. (1999). Joint management of surface and ground water supplies. *Groundwater*, 37(2), 214-222.
2. Mace, R. E., Chowdhury, A. H., Anaya, R., & Way, S. C. T. (2000). A numerical groundwater flow model of the upper and middle Trinity Aquifer, Hill Country area. Texas Water Development Board Open File Report 00-02.
3. Beckers, J., & Frind, E. O. (2001). Simulating groundwater flow and runoff for the Oro Moraine aquifer system. Part II. Automated calibration and mass balance calculations. *Journal of Hydrology*, 243(1-2), 73-90.
4. Abebe, A. J., Guinot, V., & Solomatine, D. P. (2000, July). Fuzzy alpha-cut vs. Monte Carlo techniques in assessing uncertainty in model parameters. In *Proceedings of 4th international conference on hydroinformatics, Cedar Rapids*.
5. Feyen, L., Beven, K. J., De Smedt, F., & Freer, J. (2001). Stochastic capture zone delineation within the generalized likelihood uncertainty estimation methodology: conditioning on head observations. *Water Resources Research*, 37(3), 625-638.
6. Nakao, M., Wichelns, D., & Montgomery, J. T. (2002). Game theory analysis of competition for groundwater involving El Paso, Texas and Ciudad Juarez, Mexico (No. 375-2016-19905).
7. Hsiao, C. T., & Chang, L. C. (2002). Dynamic optimal groundwater management with inclusion of fixed costs. *Journal of water resources planning and management*, 128(1), 57-65.
8. Barlow, P. M., Ahlfeld, D. P., & Dickerman, D. C. (2003). Conjunctive-management models for sustained yield of stream-aquifer systems. *Journal of Water Resources Planning and Management*, 129(1), 35-48.
9. Harrar, W. G., Sonnenborg, T. O., & Henriksen, H. J. (2003). Capture zone, travel time, and solute-transport predictions using inverse modeling and different geological models. *Hydrogeology journal*, 11(5), 536-548.
10. McPhee, J., & Yeh, W. W. G. (2004). Multiobjective optimization for sustainable groundwater management in semiarid regions. *Journal of water resources planning and management*, 130(6), 490-497.
11. Reed, P. M., & Minsker, B. S. (2004). Striking the balance: long-term groundwater monitoring design for conflicting objectives. *Journal of Water Resources Planning and Management*, 130(2), 140-149.
12. Loaiciga, H. A. (2004). Analytic game—theoretic approach to ground-water extraction. *Journal of Hydrology*, 297(1-4), 22-33.
13. Kumar, V., and Schuhmacher, M. (2005). Fuzzy uncertainty analysis in system modelling. In *Proceeding of the 38th European Symposium of the Working Party on Computer Aided Process Engineering*, May, 29th -June, 1st, Barcelona, Spain.
14. Fleckenstein, J. H., Niswonger, R. G., & Fogg, G. E. (2006). River-aquifer interactions, geologic heterogeneity, and low-flow management. *Groundwater*, 44(6), 837-852.
15. Karamouz, M., Tabari, M. M. R., & Kerachian, R. (2007). Application of genetic algorithms and artificial neural networks in conjunctive use of surface and groundwater resources. *Water International*, 32(1), 163-176.
16. Salazar, R., Szidarouszky, F., Coppola, E.J., and Rojana, A. (2007). Application of game theory for groundwater conflict in Mexico. *Journal of Environmental Management*. 84 (4), 560-571.
17. Saak, A. E., & Peterson, J. M. (2007). Groundwater use under incomplete information. *Journal of Environmental Economics and Management*, 54(2), 214-228.
18. Pisinaras, V., Petalas, C., Tsihrintzis, V. A., & Zagana, E. (2007). A groundwater flow model for water resources management in the Ismarida plain, North Greece. *Environmental Modeling & Assessment*, 12(2), 75-89.
19. Wen, X. H., Wu, Y. Q., Lee, L. J. E., Su, J. P., & Wu, J. (2007). Groundwater flow modeling in the Zhangye basin, Northwestern China. *Environmental Geology*, 53(1), 77-84.
20. Rojas, R., Feyen, L., & Dassargues, A. (2008). Conceptual model uncertainty in groundwater modeling: Combining generalized likelihood uncertainty estimation and Bayesian model averaging. *Water Resources Research*, 44(12).
21. Wang, L., Fang, L., & Hipel, K. W. (2008). Basin-wide cooperative water resources allocation. *European Journal of Operational Research*, 190(3), 798-817.
22. Chu, H. J., & Chang, L. C. (2009). Application of optimal control and fuzzy theory for dynamic groundwater remediation design. *Water resources management*, 23(4), 647-660.
23. Chadalavada, S., & Datta, B. (2008). Dynamic optimal monitoring network design for transient transport of pollutants in groundwater aquifers. *Water Resources Management*, 22(6), 651-670.

24. Kim, N. W., Chung, I. M., Won, Y. S., & Arnold, J. G. (2008). Development and application of the integrated SWAT–MODFLOW model. *Journal of hydrology*, 356(1-2), 1-16.
25. Zhang, K., Achari, G., & Li, H. (2009). A comparison of numerical solutions of partial differential equations with probabilistic and possibilistic parameters for the quantification of uncertainty in subsurface solute transport. *Journal of contaminant hydrology*, 110(1-2), 45-59.
26. Katsifarakis, K. L., Mouti, M., & Ntrogkouli, K. (2009). Optimization of groundwater resources management in polluted aquifers. *Global Nest*, 11(3), 283-290.
27. Chung, I. M., Kim, N. W., Lee, J., & Sophocleous, M. (2010). Assessing distributed groundwater recharge rate using integrated surface water-groundwater modelling: application to Mihocheon watershed, South Korea. *Hydrogeology Journal*, 18(5), 1253-1264.
28. Keating, E. H., Doherty, J., Vrugt, J. A., & Kang, Q. (2010). Optimization and uncertainty assessment of strongly nonlinear groundwater models with high parameter dimensionality. *Water Resources Research*, 46(10).
29. Faybishenko, B. (2010). Fuzzy-probabilistic calculations of water-balance uncertainty. *Stochastic Environmental Research and Risk Assessment*, 24(6), 939-952.
30. Li, H., & Zhang, K. (2010). Development of a fuzzy-stochastic nonlinear model to incorporate aleatoric and epistemic uncertainty. *Journal of contaminant hydrology*, 111(1-4), 1-12.
31. Safavi, H. R., Darzi, F., & Mariño, M. A. (2010). Simulation-optimization modeling of conjunctive use of surface water and groundwater. *Water resources management*, 24(10), 1965-1988.
32. Wu, J. C., Lu, L., & Tang, T. (2011). Bayesian analysis for uncertainty and risk in a groundwater numerical model's predictions. *Human and Ecological Risk Assessment: An International Journal*, 17(6), 1310-1331.
33. Luo, Y., and Sophocleous, M. (2011). Two-way coupling of unsaturated-saturated flow by integrating the SWAT and MODFLOW models with application in an irrigation district in arid region of West China. *Journal of Arid Land*. DOI: 10.3724/SP.J.1227.2011.00164.
34. Gaur, S., Chahar, B. R., & Gaillardot, D. (2011). Analytic elements method and particle swarm optimization based simulation–optimization model for groundwater management. *Journal of hydrology*, 402(3-4), 217-227.
35. Ketabchi, H., & Ataie-Ashtiani, B. (2010). Development of combined ant colony optimization algorithm and numerical simulation for optimal management of coastal aquifers. *Iran-Water Resources Research*, 7(1), 1-12.
36. Mahjoub, H., Mohammadi, M. M., & Parsinejad, M. (2011). Conjunctive use modeling of groundwater and surface water. *Journal of Water Resource and Protection*, 3(10), 726.
37. He, X., Sonnenborg, T. O., Jørgensen, F., Høyer, A. S., Møller, R. R., & Jensen, K. H. (2013). Analyzing the effects of geological and parameter uncertainty on prediction of groundwater head and travel time. *Hydrology and Earth System Sciences*, 17(8), 3245-3260.
38. Yihdego, Y., & Becht, R. (2013). Simulation of lake–aquifer interaction at Lake Naivasha, Kenya using a three-dimensional flow model with the high conductivity technique and a DEM with bathymetry. *Journal of Hydrology*, 503, 111-122.
39. Cao, G., Zheng, C., Scanlon, B. R., Liu, J., & Li, W. (2013). Use of flow modeling to assess sustainability of groundwater resources in the North China Plain. *Water Resources Research*, 49(1), 159-175.
40. Condon, L. E., Maxwell, R. M., & Gangopadhyay, S. (2013). The impact of subsurface conceptualization on land energy fluxes. *Advances in water resources*, 60, 188-203.
41. Singh, A. (2013). Groundwater modelling for the assessment of water management alternatives. *Journal of Hydrology*, 481, 220-229.
42. Yoon, H., Hart, D. B., & McKenna, S. A. (2013). Parameter estimation and predictive uncertainty in stochastic inverse modeling of groundwater flow: Comparing null-space Monte Carlo and multiple starting point methods. *Water Resources Research*, 49(1), 536-553.
43. Ayvaz, M. T., & Elçi, A. (2013). A groundwater management tool for solving the pumping cost minimization problem for the Tahtali watershed (Izmir-Turkey) using hybrid HS-Solver optimization algorithm. *Journal of Hydrology*, 478, 63-76.
44. Elçi, A., & Ayvaz, M. T. (2014). Differential-evolution algorithm based optimization for the site selection of groundwater production wells with the consideration of the vulnerability concept. *Journal of Hydrology*, 511, 736-749.
45. Nakhaei, M., Mohammadi, M., & Rezaei, M. (2014). Optimizing of Aquifer Withdrawal Numerical Model Using Genetic Algorithm (Case Study: Uromiyeh Coastal Aquifer). *Iran-Water Resources Research*, 10(2), 94-97.
46. Martinez, Y., & Esteban, E. (2014). Social choice and groundwater management: application of the uniform rule. *Ciencia e investigación agraria*, 41(2), 153-162.
47. El Alf, M. (2014). Numerical groundwater modelling as an effective tool for management of water resources in arid areas. *Hydrological Sciences Journal*, 59(6), 1259-1274.



48. Parsapour-Moghaddam, P., Abed-Elmdoust, A., & Kerachian, R. (2015). A heuristic evolutionary game theoretic methodology for conjunctive use of surface and groundwater resources. *Water Resources Management*, 29(11), 3905-3918.
49. Zekri, S., Triki, C., Al-Maktoumi, A., & Bazargan-Lari, M. R. (2015). An optimization-simulation approach for groundwater abstraction under recharge uncertainty. *Water resources management*, 29(10), 3681-3695.
50. Sophocleous, M. A., Koelliker, J. K., Govindaraju, R. S., Birdie, T., Ramireddygar, S. R., & Perkins, S. P. (1999). Integrated numerical modeling for basin-wide water management: The case of the Rattlesnake Creek basin in south-central Kansas. *Journal of Hydrology*, 214(1-4), 179-196.
51. Sophocleous, M., & Perkins, S. P. (2000). Methodology and application of combined watershed and ground-water models in Kansas. *Journal of hydrology*, 236(3-4), 185-201.
52. Galbiati, L., Bouraoui, F., Elorza, F. J., & Bidoglio, G. (2006). Modeling diffuse pollution loading into a Mediterranean lagoon: development and application of an integrated surface-subsurface model tool. *Ecological Modelling*, 193(1-2), 4-18.
53. Narula, K. K., & Gosain, A. K. (2013). Modeling hydrology, groundwater recharge and non-point nitrate loadings in the Himalayan Upper Yamuna basin. *Science of the Total Environment*, 468, S102-S116.
54. Pulido-Velazquez, M., Peña-Haro, S., García-Prats, A., Mocholi-Almudever, A. F., Henríquez-Dole, L., Macian-Sorribes, H., & Lopez-Nicolas, A. (2015). Integrated assessment of the impact of climate and land use changes on groundwater quantity and quality in the Mancha Oriental system (Spain). *Hydrology and Earth System Sciences*, 19(4), 1677-1693.
55. Izady, A., Davary, K., Alizadeh, A., Ziaei, A. N., Akhavan, S., Alipoor, A., ... & Brusseau, M. L. (2015). Groundwater conceptualization and modeling using distributed SWAT-based recharge for the semi-arid agricultural Neishaboor plain, Iran. *Hydrogeology Journal*, 23(1), 47-68.
56. Kamali, A., & Niksokhan, M. H. (2017). Multi-objective optimization for sustainable groundwater management by developing of coupled quantity-quality simulation-optimization model. *journal of hydroinformatics*, 19(6), 973-992.
57. Norouzi Khatiri, K., Niksokhan, M. H., & Sarang, A. (2020a). Choosing various likelihood functions on uncertainty assessment in groundwater simulation-optimization model. *Water Supply*, 20(2), 737-750.
58. Norouzi Khatiri, K., Niksokhan, M. H., Sarang, A., & Kamali, A. (2020b). Coupled simulation-optimization model for the management of groundwater resources by considering uncertainty and conflict resolution. *Water Resources Management*, 34(11), 3585-3608.
59. Gordon, E., Shamir, U., & Bensabat, J. (2001). Optimal Extraction of Water from Regional Aquifer under Salinization. *Journal of Water Resources Planning and Management*, 127(2), 71-77.
60. Wu, J., Zheng, C., Chien, C. C., & Zheng, L. (2006). A comparative study of Monte Carlo simple genetic algorithm and noisy genetic algorithm for cost-effective sampling network design under uncertainty. *Advances in Water Resources*, 29(6), 899-911.
61. Feyen, L., & Caers, J. (2006). Quantifying geological uncertainty for flow and transport modeling in multi-modal heterogeneous formations. *Advances in Water Resources*, 29(6), 912-929.
62. Kourakos, G., & Mantoglou, A. (2008). Remediation of heterogeneous aquifers based on multiobjective optimization and adaptive determination of critical realizations. *Water Resources Research*, 44(12).
63. Rejani, R., Jha, M. K., Panda, S. N., & Mull, R. (2008). Simulation modeling for efficient groundwater management in Balasore coastal basin, India. *Water Resources Management*, 22(1), 23-50.
64. Bazargan-Lari, M. R., Kerachian, R., & Mansoori, A. (2009). A conflict-resolution model for the conjunctive use of surface and groundwater resources that considers water-quality issues: a case study. *Environmental management*, 43(3), 470-482.
65. Harou, J. J., Pulido-Velazquez, M., Rosenberg, D. E., Medellín-Azuara, J., Lund, J. R., & Howitt, R. E. (2009). Hydro-economic models: Concepts, design, applications, and future prospects. *Journal of Hydrology*, 375(3-4), 627-643.
66. Medhat, A., and El-Bihery. (2009). Groundwater flow modeling of quaternary aquifer Ras Sudr, Egypt. *Enviroment. Geology*. 58, 1095-1105.
67. Kerachian, R., Fallahnia, M., Bazargan-Lari, M. R., Mansoori, A., & Sedghi, H. (2010). A fuzzy game theoretic approach for groundwater resources management: Application of Rubinstein Bargaining Theory. *Resources, Conservation and Recycling*, 54(10), 673-682.
68. Singh, A., & Panda, S. N. (2012). Integrated salt and water balance modeling for the management of waterlogging and salinization. I: Validation of SAHYSMOD. *Journal of irrigation and drainage engineering*, 138(11), 955-963.
69. Qin, X. S. (2012). Assessing environmental risks through fuzzy parameterized probabilistic analysis. *Stochastic Environmental Research and Risk Assessment*, 26(1), 43-58.
70. Dhar, A., & Patil, R. S. (2012). Multiobjective design of groundwater monitoring network under epistemic uncertainty. *Water resources management*, 26(7), 1809-1825.

71. Wang, H., & Jin, X. (2013). Characterization of groundwater contaminant source using Bayesian method. *Stochastic environmental research and risk assessment*, 27(4), 867-876.
72. Eltarabily, M. G., Negm, A. M., Yoshimura, C., & Saavedra, O. C. (2017). Modeling the impact of nitrate fertilizers on groundwater quality in the southern part of the Nile Delta, Egypt. *Water Science and Technology: Water Supply*, 17(2), 561-570.
73. Heydari, F., Saghafian, B., & Delavar, M. (2016). Coupled quantity-quality simulation-optimization model for conjunctive surface-groundwater use. *Water Resources Management*, 30(12), 4381-4397.
74. Alizadeh, M. R., Nikoo, M. R., & Rakhshandehroo, G. R. (2017b). Developing a multi-objective conflict-resolution model for optimal groundwater management based on fallback bargaining models and social choice rules: a case study. *Water Resources Management*, 31(5), 1457-1472.
75. Nazari, S., & Ahmadi, A. (2019). Non-cooperative stability assessments of groundwater resources management based on the tradeoff between the economy and the environment. *Journal of Hydrology*, 578, 124075.
76. Barlow, P. M., Ahlfeld, D. P., & Dickerman, D. C. (2003). Conjunctive-management models for sustained yield of stream-aquifer systems. *Journal of Water Resources Planning and Management*, 129(1), 35-48.
77. Bayer, P., & Finkel, M. (2007). Optimization of concentration control by evolution strategies: Formulation, application, and assessment of remedial solutions. *Water resources research*, 43(2).
78. Alizadeh, M. R., Nikoo, M. R., & Rakhshandehroo, G. R. (2017a). Developing a multi-objective conflict-resolution model for optimal groundwater management based on fallback bargaining models and social choice rules: a case study. *Water Resources Management*, 31(5), 1457-1472.
79. Ababou, R., & Al-Bitar, A. (2004). Salt water intrusion with heterogeneity and uncertainty: mathematical modeling and analyses. In *Developments in Water Science* (Vol. 55, pp. 1559-1571). Elsevier.
80. Juckem, P. F., Fienen, M. N., & Hunt, R. J. (2014). Simulation of groundwater flow and interaction of groundwater and surface water on the Lac du Flambeau Reservation, Wisconsin (No. 2014-5020). US Geological Survey.
81. Hamraz, B., Akbarpour, A., Pourreza Bilondi, M., & Sadeghi Tabas, S. (2015). On the assessment of ground water parameter uncertainty over an arid aquifer. *Arabian journal of Geosciences*, 8(12), 10759-10773.
